# Supplementary material for: SARS-CoV-2 N protein recruits G3BP to double membrane vesicles to promote translation of viral mRNAs
Source: Springer Nature journal article supplement (doi:10.1038/s41467-024-54996-3), 2024-12-05
Supplement: MOESM1 [file 41467_2024_54996_MOESM1_ESM.pdf]

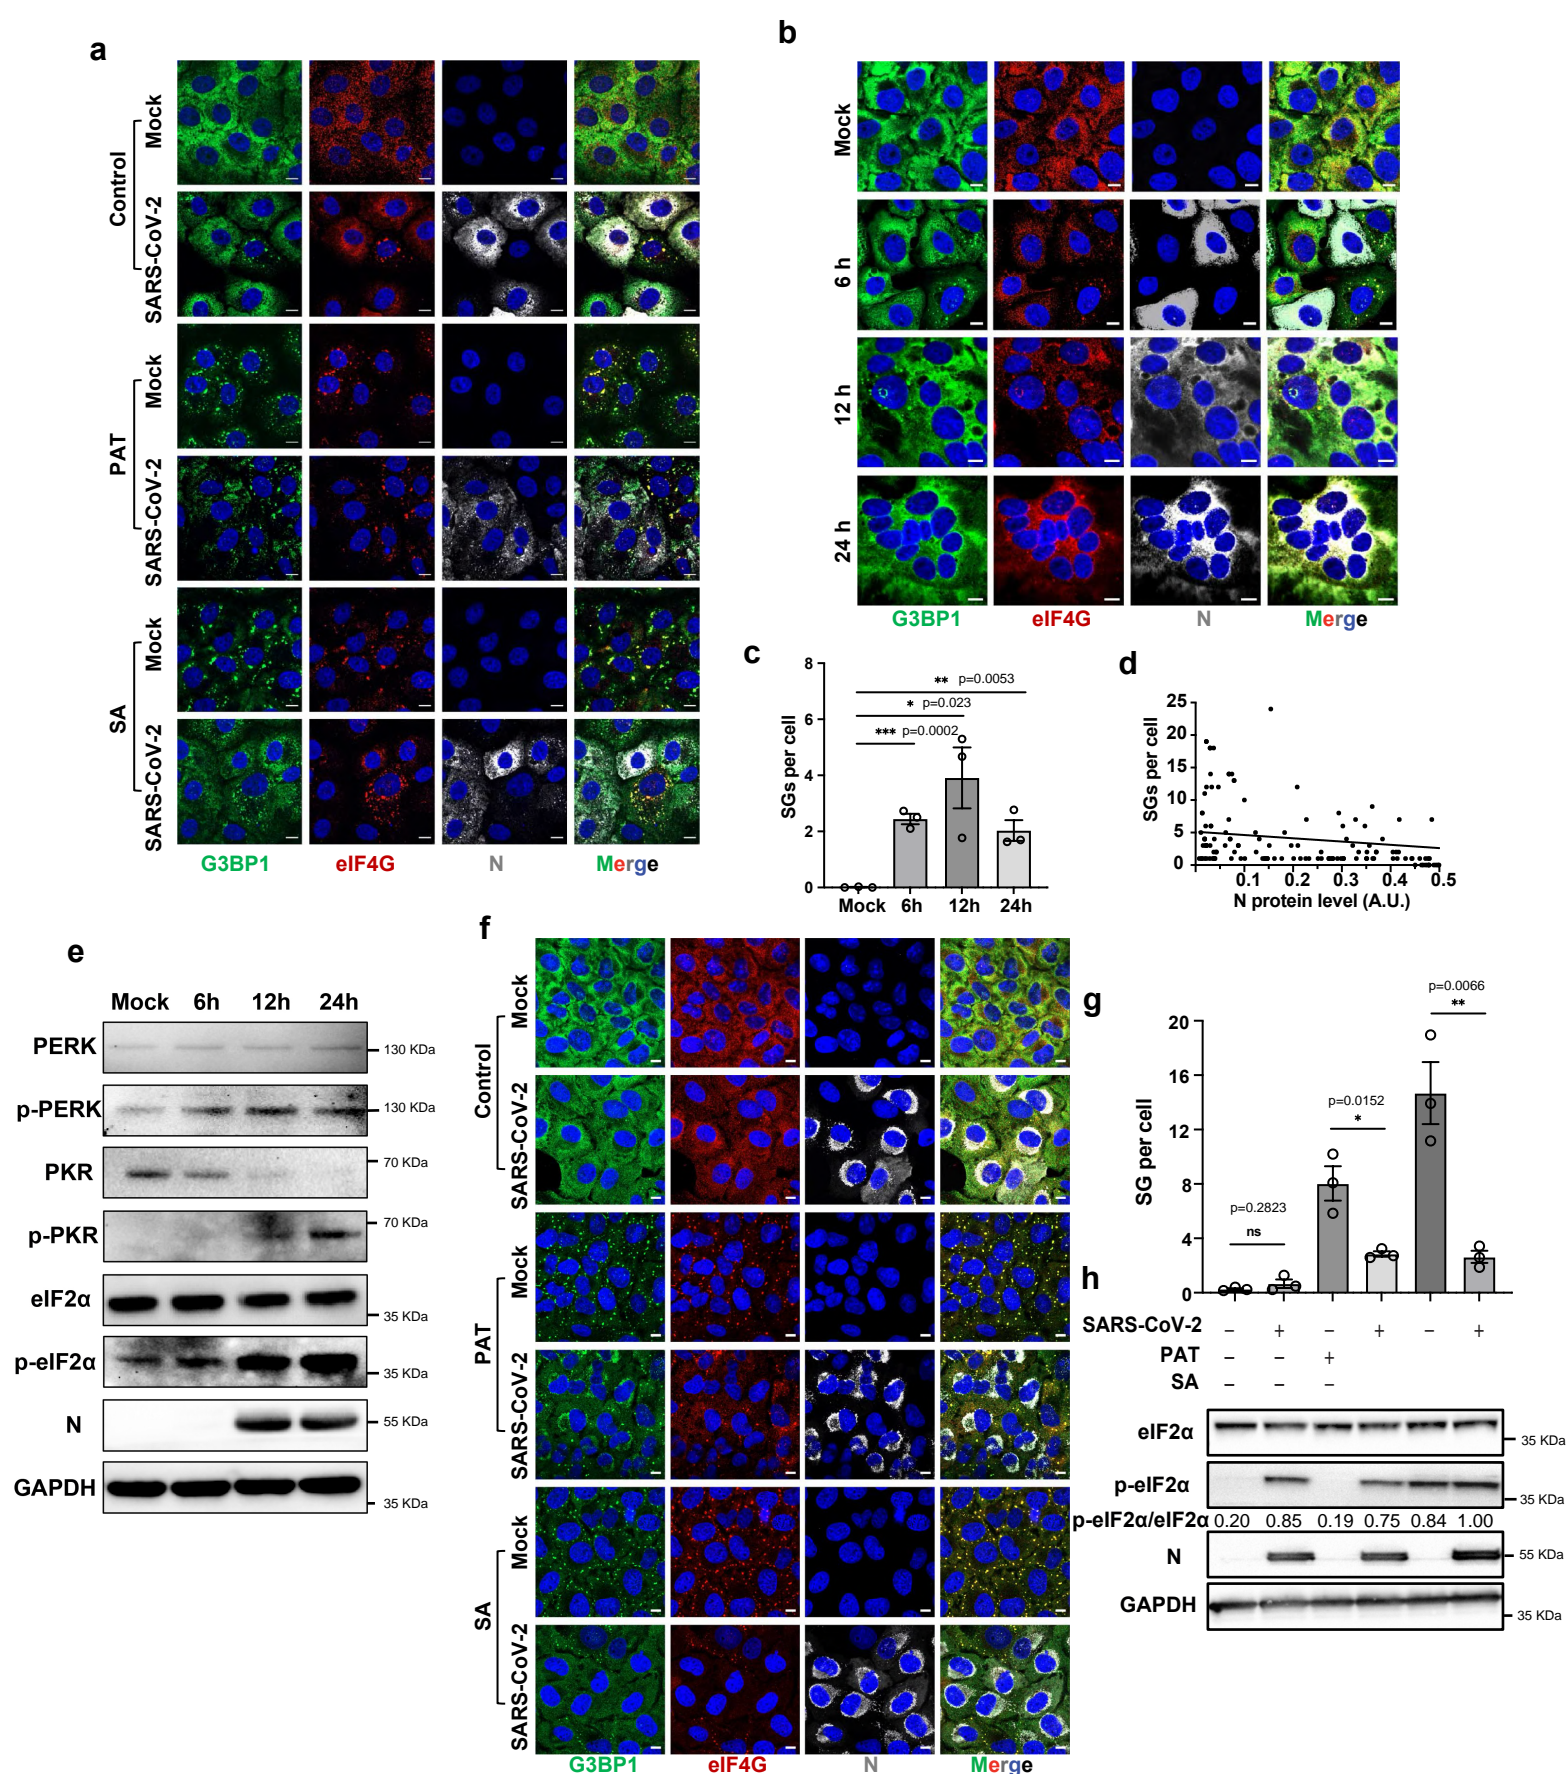

**Supplementary Fig. 1. SARS-CoV-2 infection inhibited SG formation independently of eIF2 $\alpha$ .** (a) VeroE6 cells were infected with SARS-CoV-2 at 0.5 MOI. At 6 hpi, cells were stressed with SA or PAT for 1h before fixation. Cells were stained for indicated antibodies and representative images from three independent experiments are shown. Scale bar = 10  $\mu$ m. (b) U2OS-ACE2 cells were mock infected or infected with SARS-CoV-2 WT at 0.5 MOI. Cells were fixed at 6, 12, 24 h and stained using indicated antibodies. Scale bar = 10  $\mu$ m. (c-d) Quantification of SG foci and N protein intensity from (a) were performed by CellProfiler. (c) Bars represent mean  $\pm$  SEM for  $n=3$  biological replicates with each dot representing the mean of 30 cells. (d)  $n=298$  cells. The correlation of N protein level and SG numbers per cell was calculated by Pearson correlation coefficient  $r = -0.3$ ,  $p < 0.0001$  (two-tailed). (e) U2OS-ACE2 cells were infected with SARS-CoV-2 at 0.5 MOI for 6, 12, 24 h, respectively. Cell lysates were separated by SDS-PAGE and probed with indicated antibodies. Representative images from three independent experiments are shown. (f) U2OS-ACE2 cells were mock infected or infected with SARS-CoV-2 at 0.5 MOI. At 6 hpi, cells were stressed with SA or PAT for 1h before fixation and staining with indicated antibodies. Representative images from three independent experiments are shown. Scale bar = 10  $\mu$ m. (g) Quantification of SG foci in (f) was performed by CellProfiler. Bars represent mean  $\pm$  SEM for  $n=3$  biological replicates with each dot representing the mean of 25 cells. (h) Cells were lysed for immunoblotting with indicated antibodies, and representative images from three independent experiments are shown.



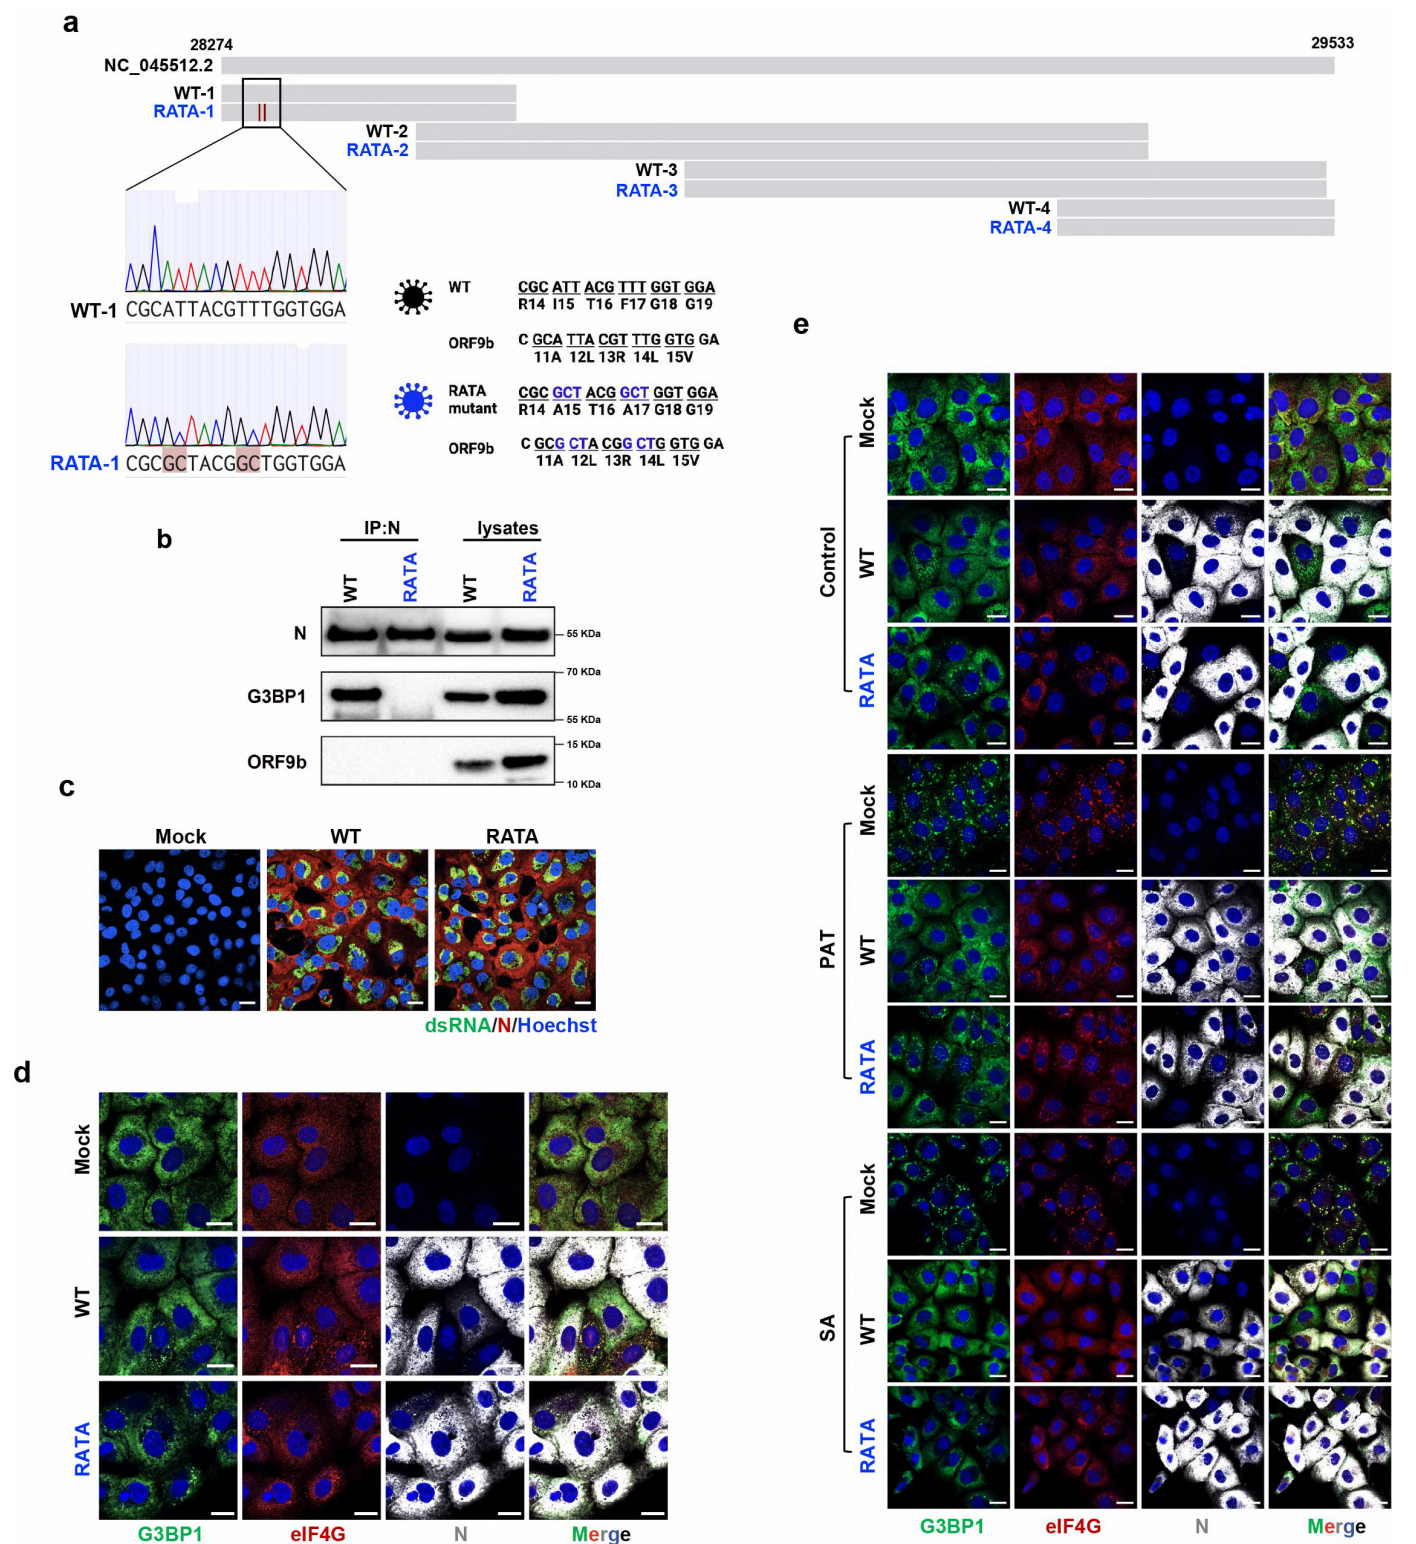

**Supplementary Fig. 2. SARS-CoV-2 WT and RATA mutant.** (a) Sanger sequencing of RATA P0 stock confirmed that no additional mutations were present in the N/ORF9b gene, created in BioRender. The alignment of sequenced data was performed using Benchling. The template sequence NC\_045512.2 (28274-29533) served as the reference sequence. (b) VeroE6 were infected with SARS-CoV-2 or RATA mutant (P0 stock) for 48 h, cells were lysed and immunoprecipitated using N antibody for immunoblotting with indicated antibodies. Representative images from three independent experiments are shown. (c) VeroE6 cells were infected with P0 stock of rescued WT or RATA mutant for 24 h, then fixed and stained with dsRNA (green) and N (red), Hoechst (blue). Representative images from three independent experiments are shown. Scale bar = 20  $\mu$ m. (d) VeroE6 cells were infected with WT virus or RATA mutant at 0.5 MOI for 6 h and then fixed and stained with indicated antibodies. Representative images from three independent experiments are shown. Scale bar = 20  $\mu$ m. (e) VeroE6 cells were infected with SARS-CoV-2 WT or RATA at 0.5 MOI. At 6 hpi, cells were stressed with SA or PAT for 1h before fixation and staining with indicated antibodies. Representative images from three independent experiments are shown. Scale bar = 20  $\mu$ m.



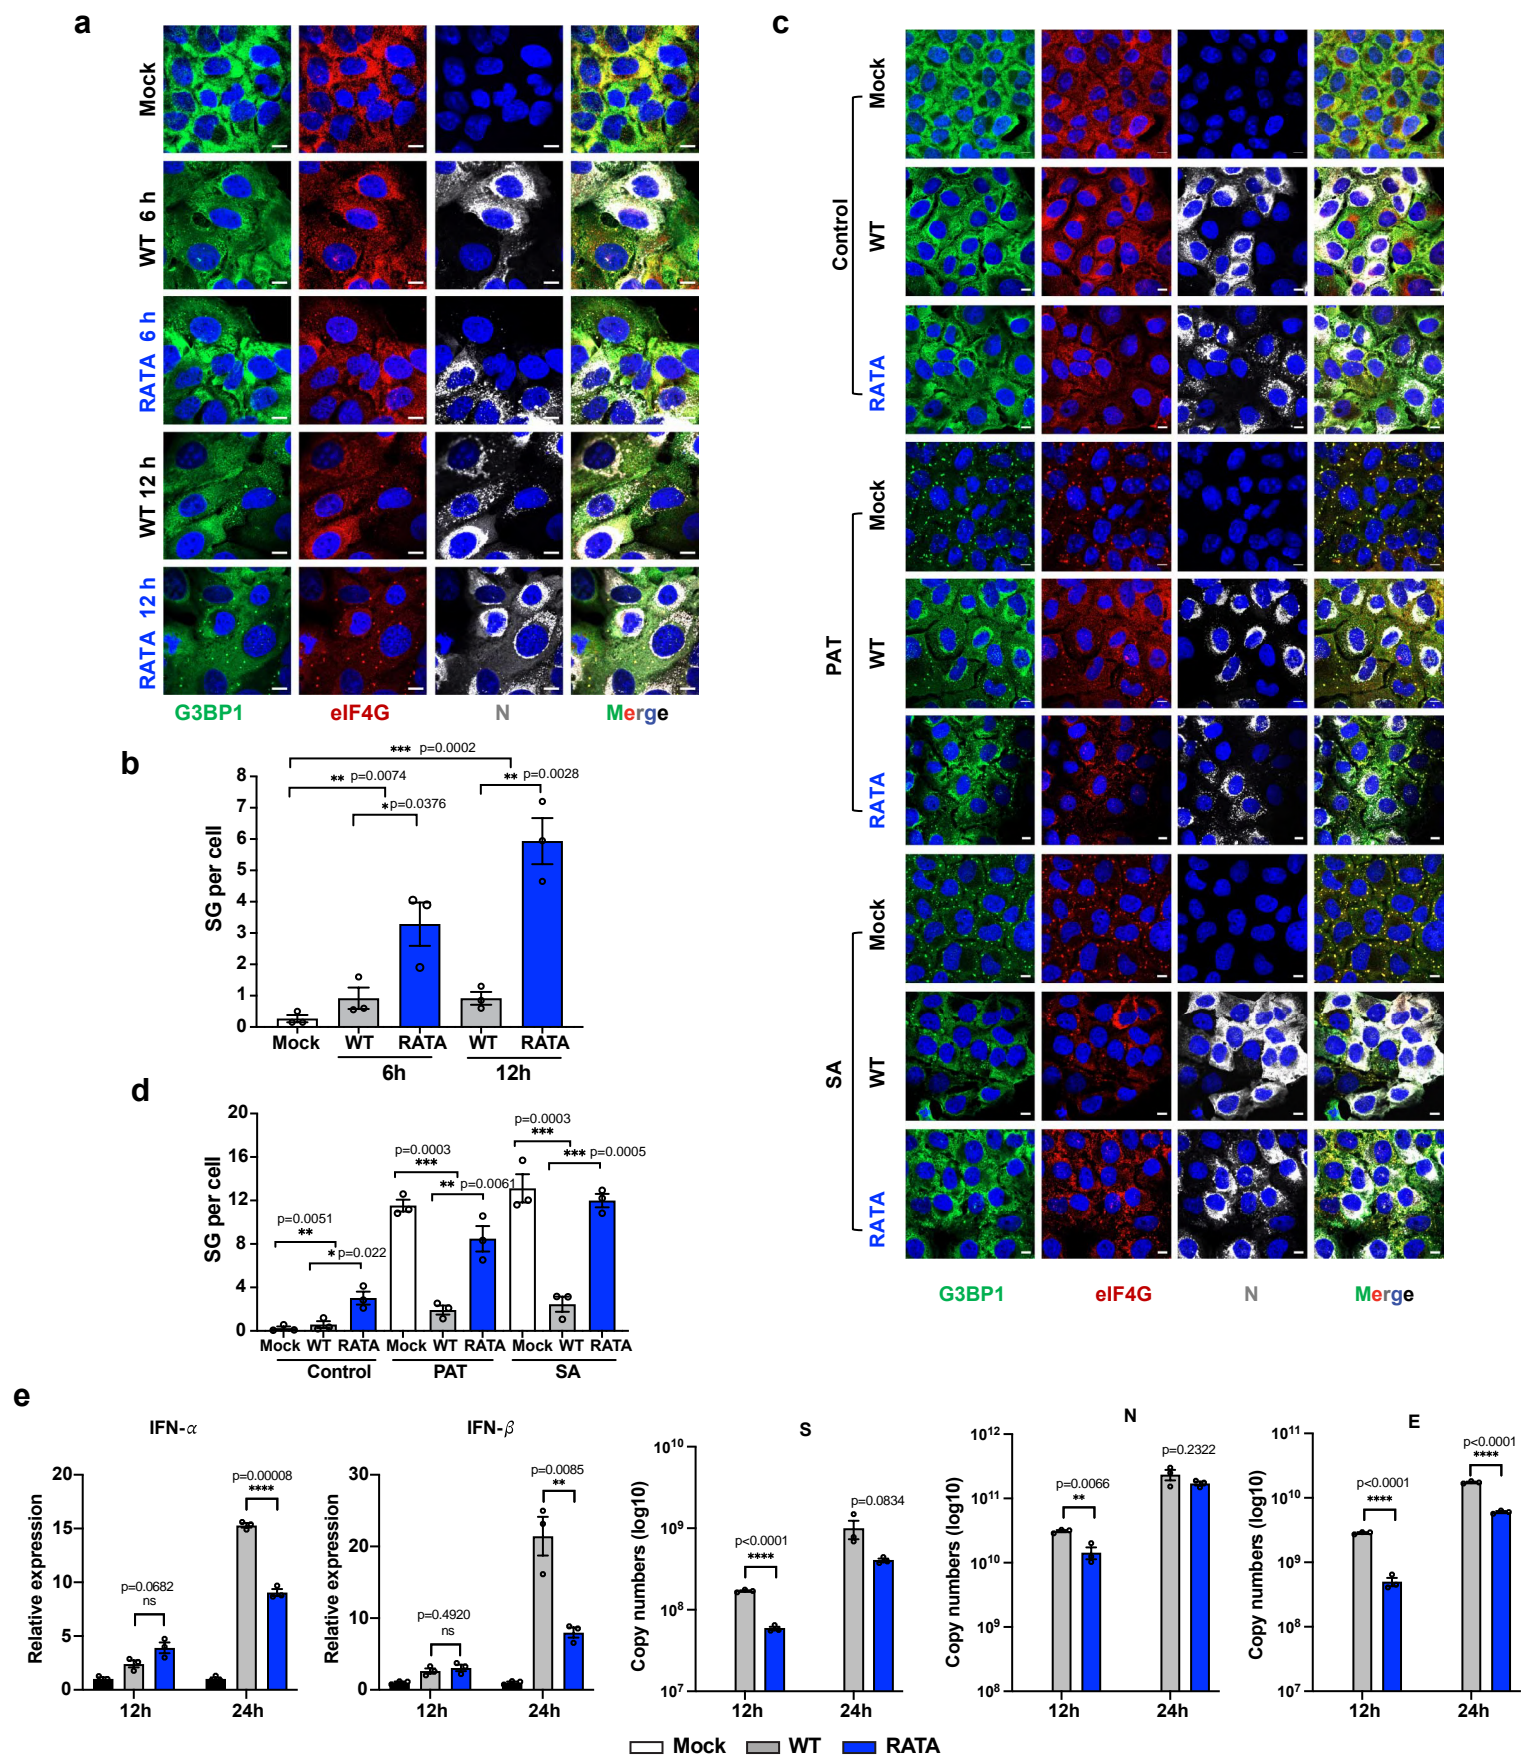

**Supplementary Fig. 3. SARS-CoV-2 RATA is defective in SG inhibition and is attenuated in multiple cell lines.** (a) U2OS-ACE2 cells were infected with SARS-CoV-2 WT or RATA at 0.5 MOI for 6 or 12 h, and then fixed and stained with indicated antibodies. Representative images from three independent experiments are shown. Scale bar = 10  $\mu$ m. (b) Quantification of SG foci from (a) was performed using CellProfiler. Bars represent mean  $\pm$  SEM for n=3 biological replicates with each dot representing the mean of 20 cells. (c) U2OS-ACE2 cells were infected with WT virus or RATA mutant at 0.5 MOI. At 6 hpi, cells were stressed with SA or PAT for 1h before fixation and staining with indicated antibodies. Representative images from three independent experiments are shown. Scale bar = 10  $\mu$ m. (d) Quantification of SG foci in (c) was performed using CellProfiler. Bars represent mean  $\pm$  SEM for n=3 biological replicates with each dot representing the mean of 30 cells. (e) RT-qPCR analysis for quantification of IFN- $\alpha$ , IFN- $\beta$  expression and viral genome copies (S, N, E) from U2OS-ACE2 cells infected with SARS-CoV-2 WT or SARS-CoV-2 RATA at 0.05 MOI (n=3 biological replicates).



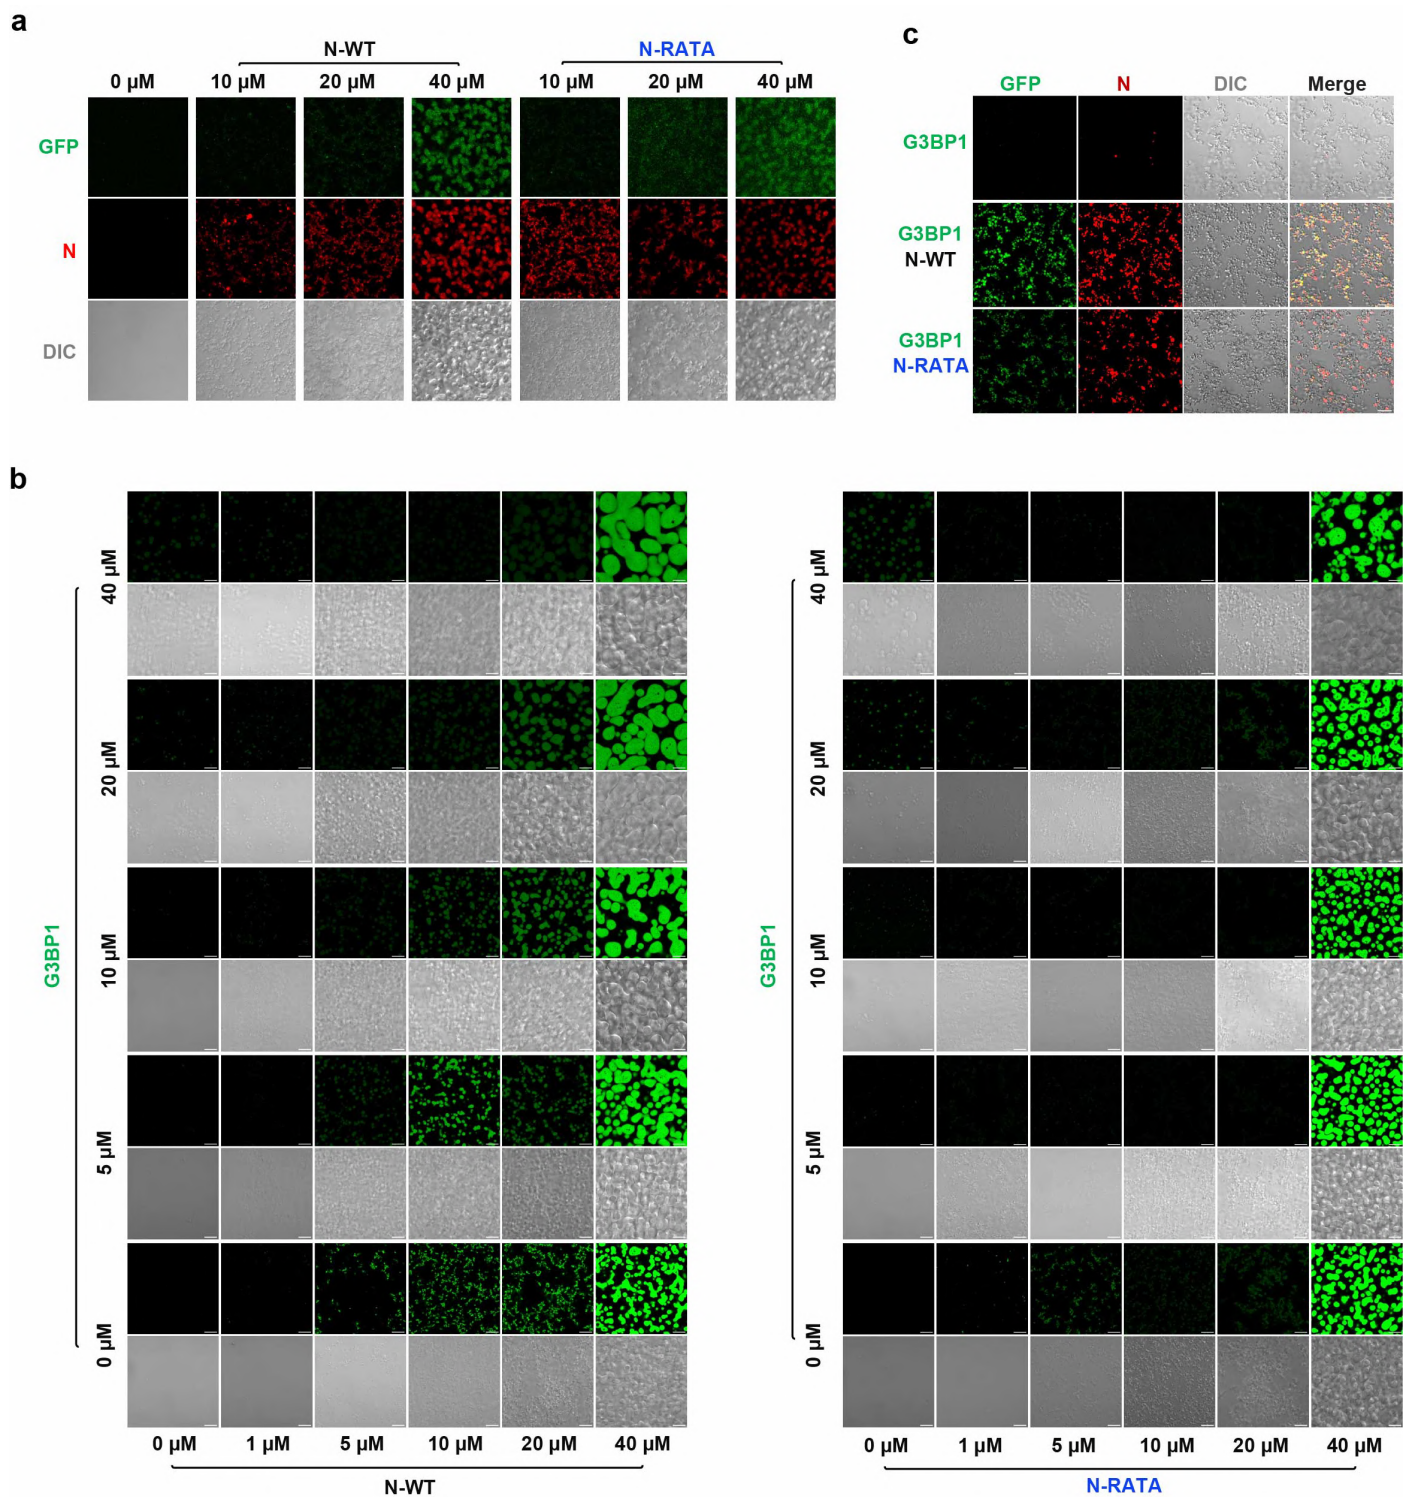

**Supplementary Fig. 4. G3BP1 facilitates LLPS of N, and G3BP-N induces distinct lysate granules.** (a) Purified N-WT or N-RATA protein was added at varying concentrations to lysates from  $\Delta\Delta$ GFP cells (lacking both G3BP1 and G3BP2, and stably expressing GFP alone). N specific antibodies conjugated to Alexa Fluor 647 was used to visualize N protein. Representative images from three independent experiments are shown. (b) Phase separation behaviours of the N-WT or N-RATA with increasing concentrations of purified G3BP1 in  $\Delta\Delta$ GFP-G1-WT cell lysate. (c) Addition of purified G3BP1 (20  $\mu$ M), N-WT (10  $\mu$ M) or N-RATA (10  $\mu$ M), RNase A into  $\Delta\Delta$ GFP-G1-WT cell lysate. Fluor-conjugated antibodies were used to visualize N (red), eIF4G (yellow), and GFP (green) indicated GFP-G3BP1. Representative images from three independent experiments are shown. Scale bar = 10  $\mu$ m.



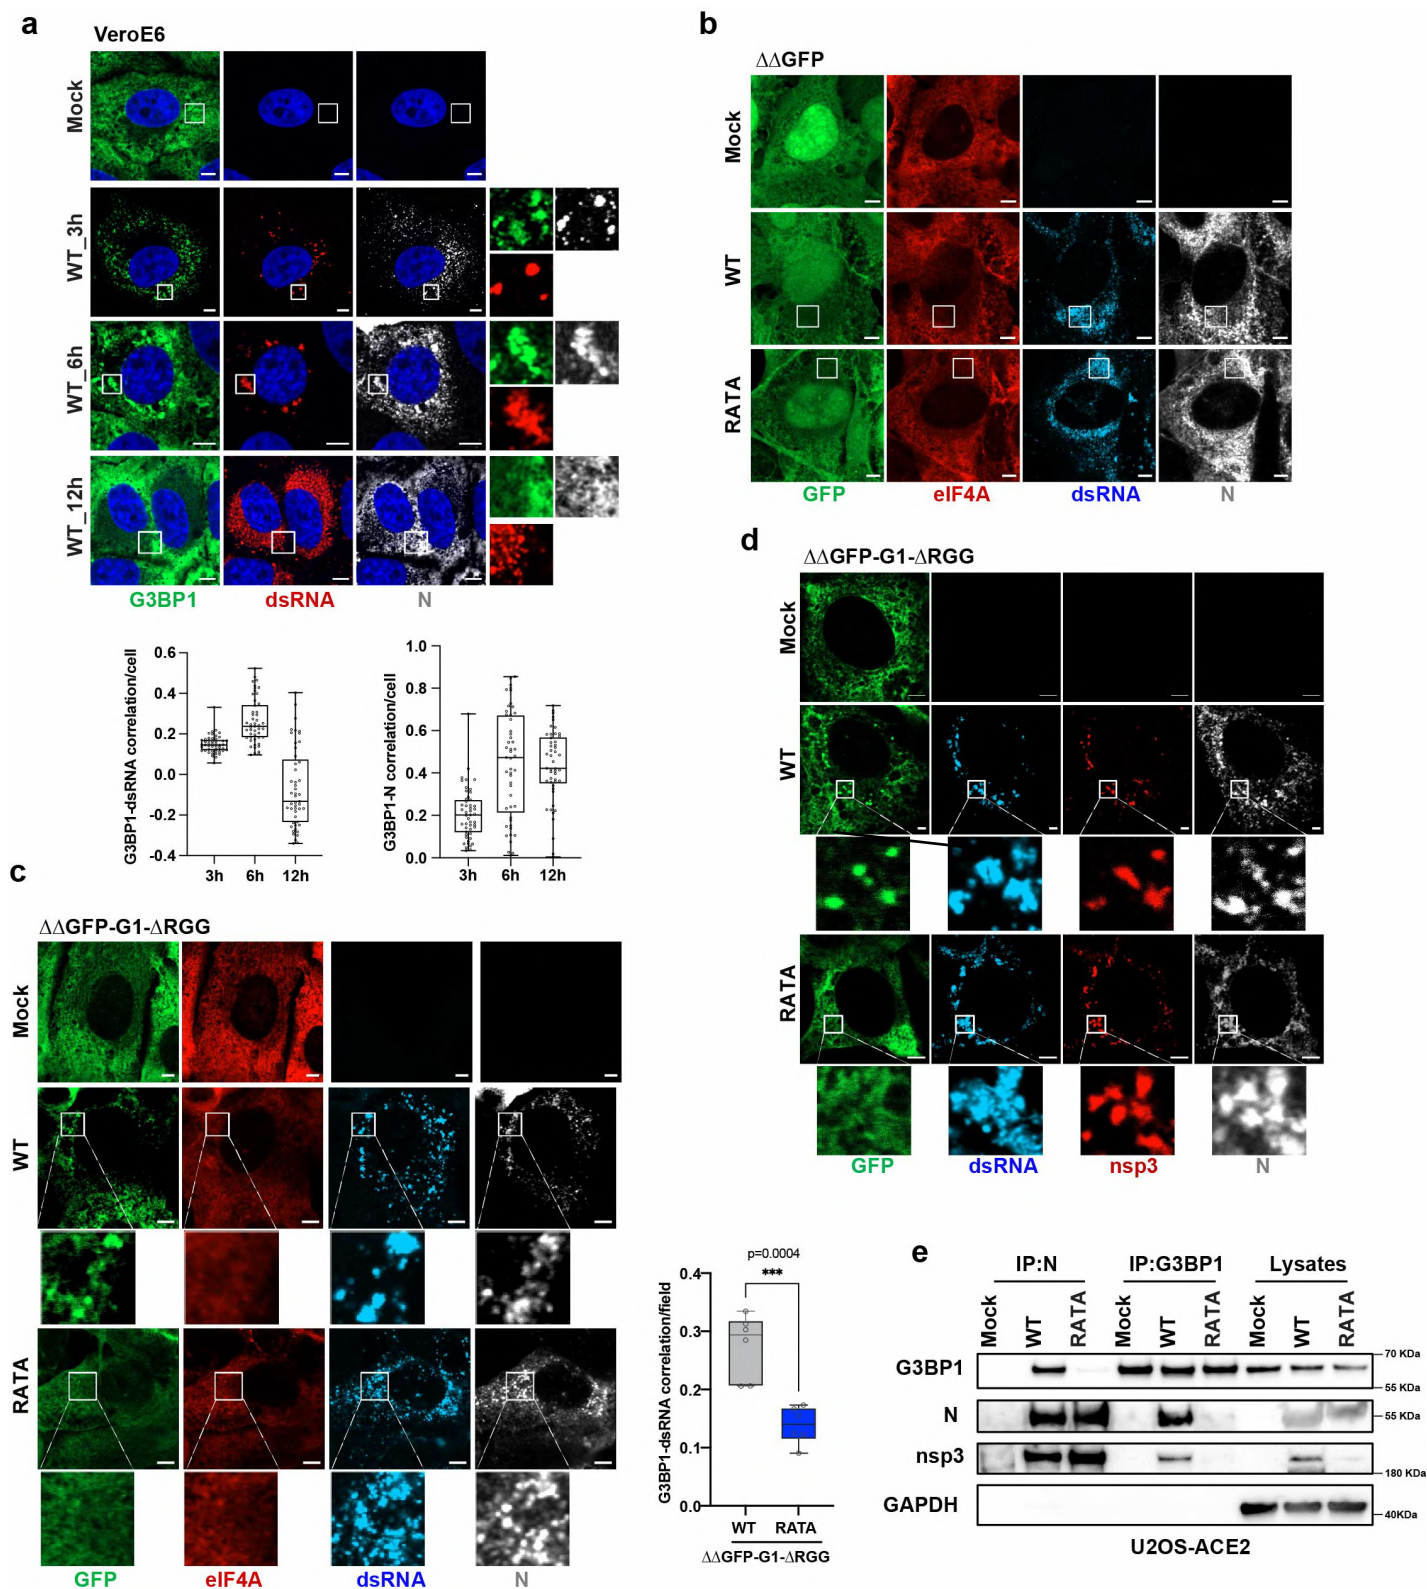

**Supplementary Fig. 5. N recruits G3BP1 to RTC early in infection via interaction with pore protein nsp3.** (a) VeroE6 cells were infected with WT SARS-CoV-2 at 0.5 MOI. Cells were fixed at indicated time point and stained for G3BP1 (green), dsRNA (red) and N (grey), Hoechst (blue). Representative images from three independent experiments are shown. Scale bar = 5  $\mu$ m. Correlations of G3BP1-dsRNA, or G3BP1-N were calculated in CellProfiler based on Pearson's correlation coefficient for  $n = 49$  infected cells. (b-d) Indicated cell lines were infected with SARS-CoV-2 WT or RATA at 0.5 MOI for 6 h. Cells were fixed and stained for dsRNA (blue), N (grey) and eIF4A (b-c) or nsp3 (d). Representative images from three independent experiments are shown. Scale bar = 5  $\mu$ m. Pearson's correlation coefficients for colocalization of G3BP1 and dsRNA in  $\Delta\Delta$ GFP-G1- $\Delta$ RGG cells were analyzed in CellProfiler ( $n = 6$  dsRNA-positive fields). (e) U2OS-ACE2 cells were infected with WT virus or RATA mutant at 0.01 MOI for 24 h. Cells were lysed and immunoprecipitated with G3BP1 or N antibody for immunoblotting as indicated. Representative images from three independent experiments are shown.

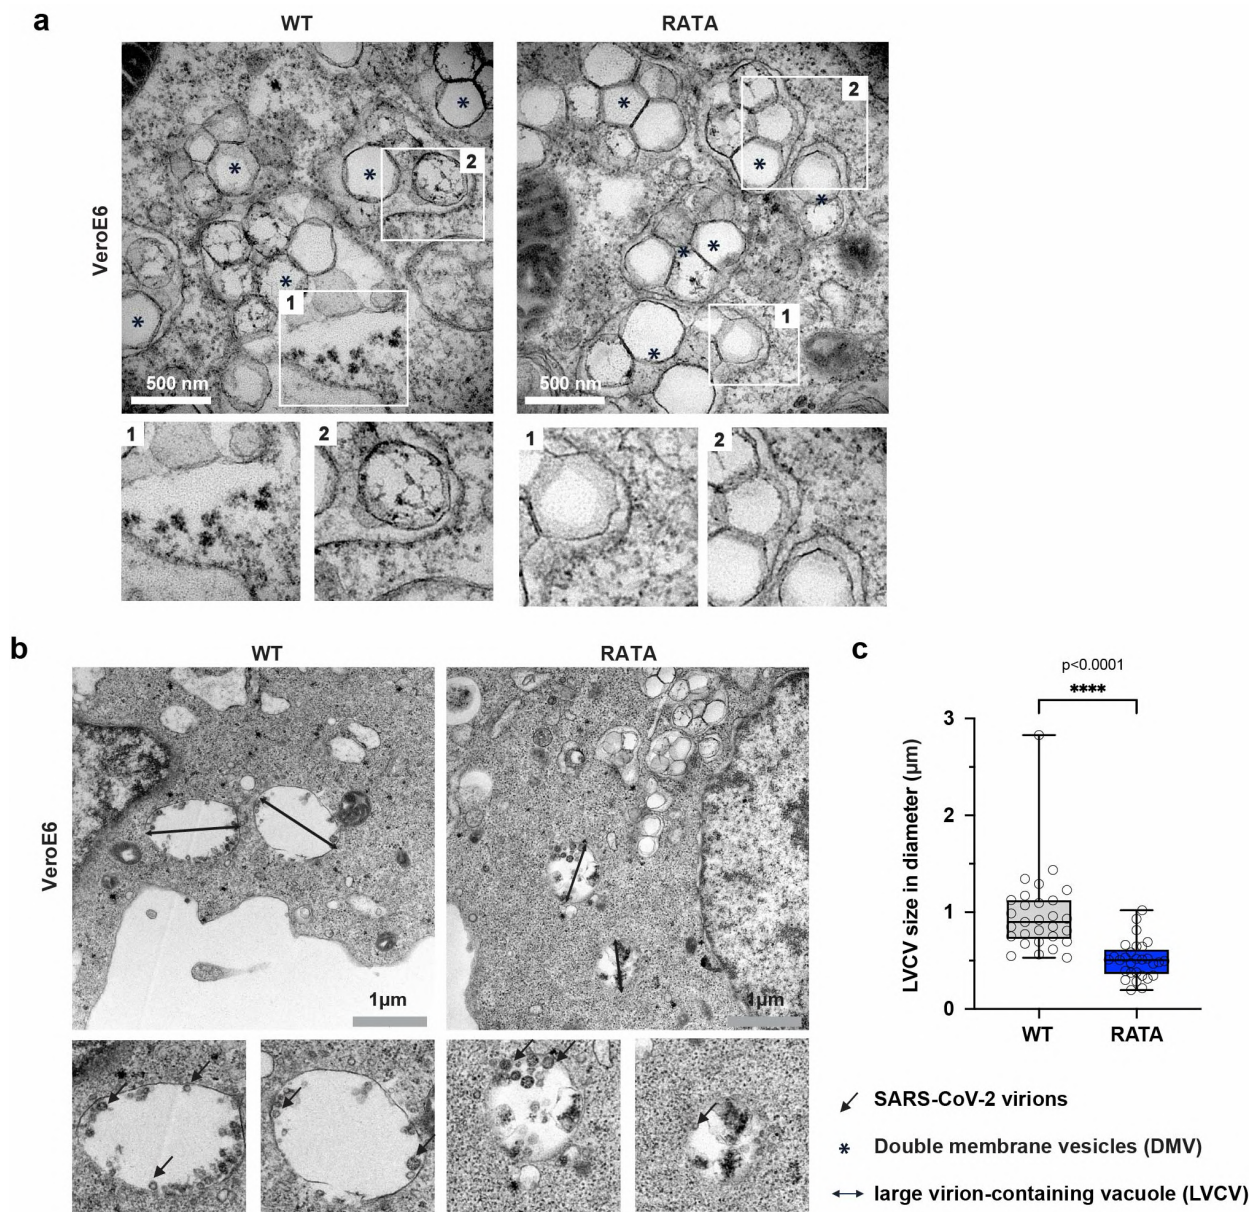

**Supplementary Fig. 6. G3BP1 recruits 40S ribosomal subunit to viral factories.** (a) VeroE6 cells were infected with SARS-CoV-2 WT or RATA at 0.5 MOI for 10 h and processed for TEM. Scale bar = 500 nm. DMV are indicated with asterisks, (b) and the large virion-containing vacuole (LVCV) with double-headed arrows, black arrow indicates SARS-CoV-2 virions. Scale bar = 1  $\mu$ m. (c) Analysis of size of LVCV (n=29) in SARS-CoV-2 WT or RATA mutant infected VeroE6 cells.



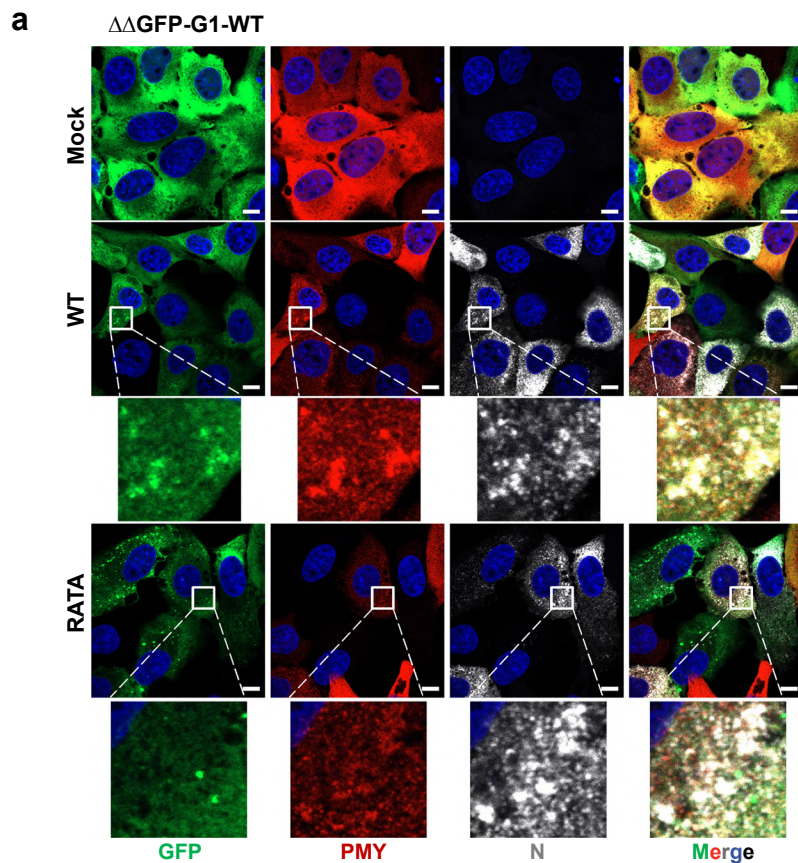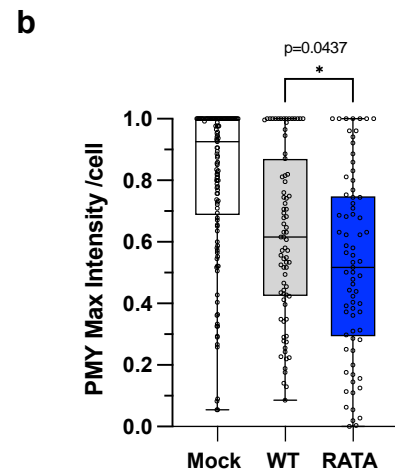

**Supplementary Fig. 7. G3BP1 recruits 40S ribosomal subunit to viral factories.** (a)  $\Delta\Delta$ GFP-G1-WT cells were infected with SARS-CoV-2 WT or RATA at 0.5 MOI for 6 h. Cells were incubated with PMY (20  $\mu$ g/mL) for 2 min before fixation and stained for PMY (red), N (grey), Hoechst (blue). Representative images from three independent experiments are shown. Scale bar = 10  $\mu$ m. (b) PMY max intensity were calculated in CellProfiler for  $n = 125$  in mock cells,  $n=79$  in WT-infected cells,  $n=73$  in RATA-infected cells.

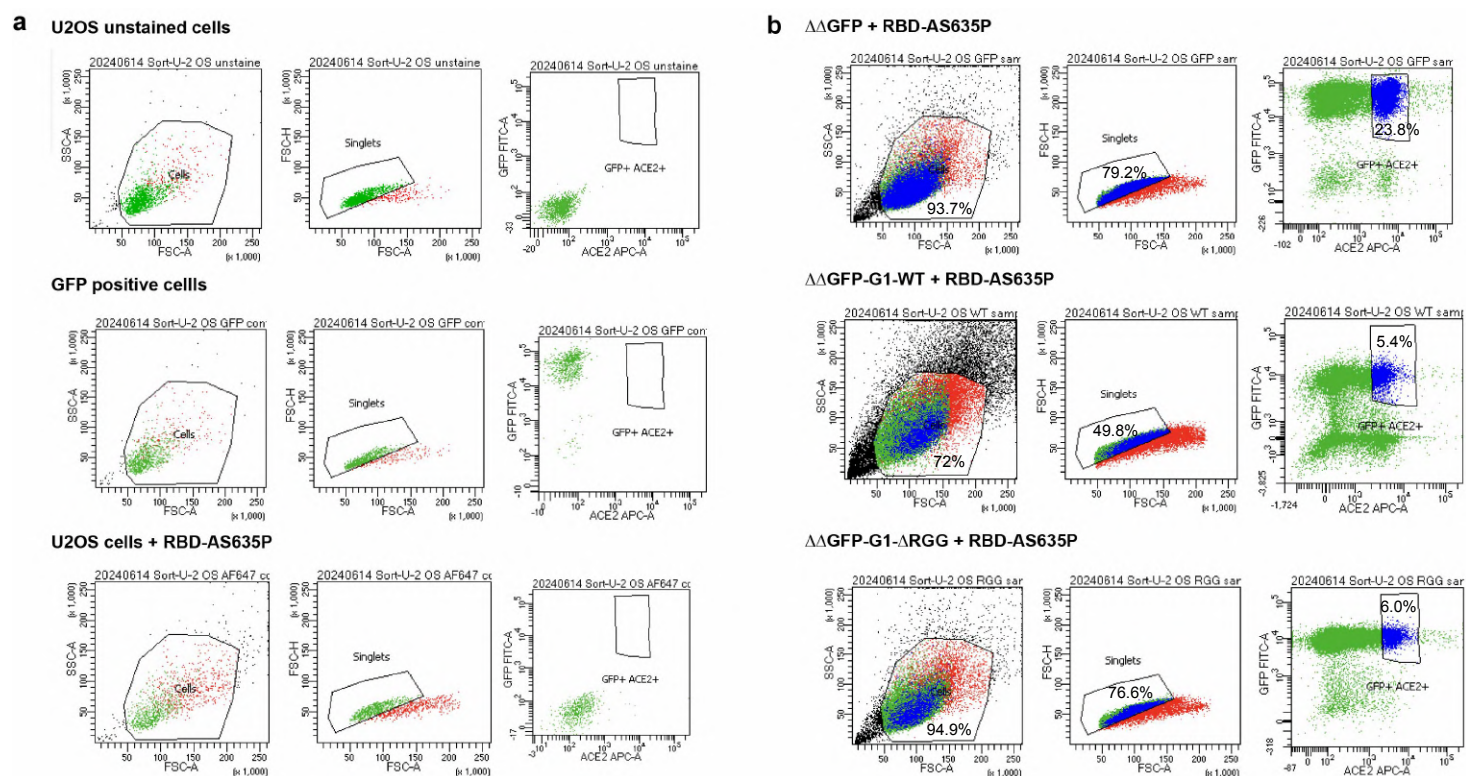

**Supplementary Fig. 8. Gating strategy for FACS based on the expression of enhanced green fluorescent protein (GFP) and RBD-AS635P nanobody binding specific to ACE2.** (a) "GFP+, ACE2+" gating was established using unstained U2OS cells, GFP-positive cells ( $\Delta\Delta$ GFP), and U2OS cells stained with RBD-AS635P. (b) The same gate was used to sort "GFP+, ACE2+" populations for  $\Delta\Delta$ GFP cells,  $\Delta\Delta$ GFP-G1-WT cells, or  $\Delta\Delta$ GFP-G1- $\Delta$ RGG cells, respectively. The percentage of cells within the entire population is indicated in the figure.



**Supplementary Table. 1. Primers sequence.**

| Primer            | Sequence                               | Usage                                          |
|-------------------|----------------------------------------|------------------------------------------------|
| RATA-F            | AAATGCACCCCGCGCTACGGCTGGTGGACCCTCAGATT | Generating pCC1-4K-SARS-CoV-2-RATA plasmid     |
| RATA-R            | CGCTGATTTTGGGGTCCATTATCAGACATTTTAGTTTG |                                                |
| N-seq 1           | CAA CCC ATA TGA TGC CGT CTT TG         | Sequencing primers as shown in Supplementary 2 |
| N-seq-2           | CGAGGACAAGGCGTTCCAATTAAC               |                                                |
| N-seq 3           | AAAGATCACATTGGCACCCGC                  |                                                |
| N-seq 4           | GGGACCAGGAACATAATCAGAC                 |                                                |
| IFN- $\alpha$ 1-F | AGAAGGCTCCAGCCATCTCTGT                 | RT-qPCR                                        |
| IFN- $\alpha$ 1-R | TGCTGGTAGAGTTCGGTGCAGA                 |                                                |
| IFN- $\beta$ -F   | CTTGATTCTTACAAAGAAGCAGC                |                                                |
| IFN- $\beta$ -R   | TCCTCCTTCTGGAAGTCTGCA                  |                                                |
| GAPDH-F           | GTCTCCTCTGACTTCAACAGCG                 |                                                |
| GAPDH-R           | ACCACCCTGTTGCTGTAGCCAA                 |                                                |
| S-F               | GAA CAA GAC AAA AAC ACC CAA G          |                                                |
| S-R               | GCA ATA TCA CCA AGG CAA TCA C          |                                                |
| N-F               | AAGCTGGACTTCCCTATGGTG                  |                                                |
| N-R               | CGATTGCAGCATTGTTAGCAGG                 |                                                |
| E-F               | ACAGGTACGTTAATAGTTAATAGCGT             |                                                |
| E-R               | ATATTGCAGCAGTACGCACACA                 |                                                |

**Supplementary Table. 2. Antibodies list.**

| Antibody                        | Company                  | Cat. No                   | Dilution |
|---------------------------------|--------------------------|---------------------------|----------|
| <b>Immunofluorescence assay</b> |                          |                           |          |
| G3BP1                           | ProteinTech              | 13057-2-AP                | 1:300    |
| eIF4G                           | Santa Cruz               | sc-133155                 | 1:100    |
| eIF4A                           | Abcam                    | ab31217                   | 1:100    |
| SARS-CoV-2 N                    | OriGene                  | TA190323                  | 1:500    |
| SARS-CoV-2 nsp3                 | GeneTex                  | GTX135589                 | 1:500    |
| dsRNA                           | SCICONS                  | 10010200                  | 1:200    |
| PMY                             | Millipore                | MABE343                   | 1:500    |
| Alexa Fluor 488                 | Thermo Fisher Scientific | A21206                    | 1:1000   |
| Alexa Fluor 568                 | Thermo Fisher Scientific | A10037                    | 1:1000   |
| Alexa Fluor 568                 | Thermo Fisher Scientific | A10042                    | 1:500    |
| Alexa Fluor 647                 | Thermo Fisher Scientific | A21445                    | 1:1000   |
| Alexa Fluor 405                 | Thermo Fisher Scientific | A31553                    | 1:500    |
| Hoechst 33258                   | Thermo Fisher Scientific | H21491                    | 1:20000  |
| <b>LLPS</b>                     |                          |                           |          |
| Caprin1                         | ProteinTech              | 15112-1-AP                | 1:50     |
| Actin                           | Santa Cruz               | sc-69879                  | 1:500    |
| SARS-CoV-2 N                    | OriGene                  | TA190323                  | 1:500    |
| <b>CO-IP</b>                    |                          |                           |          |
| G3BP1                           | ProteinTech Group        | 13057-2-AP                | 1:300    |
| SARS-CoV-2 N                    | Abcam                    | ab271180                  | 1:500    |
| GFP                             | Thermo Fisher Scientific | A6455                     | 1:400    |
| <b>Western blot</b>             |                          |                           |          |
| PERK                            | Bioss                    | BS-2469R-TR               | 1:1000   |
| p-PERK                          | Thermo Fisher Scientific | MA5-15033                 | 1:1000   |
| PKR                             | Abcam                    | ab184257                  | 1:2000   |
| p-PKR (T446)                    | Abcam                    | ab32036                   | 1:1000   |
| eIF2a                           | Santa Cruz               | sc133132                  | 1:1000   |
| eIF2a-s52                       | Thermo Fisher Scientific | 44-728G                   | 1:1000   |
| G3BP1                           | ProteinTech Group        | 13057-2-AP                | 1:2000   |
| G3BP2                           | ProteinTech Group        | 16276-1-AP                | 1:2000   |
| ORF9b                           | Thermo Fisher Scientific | PA5-116951                | 1:2000   |
| GAPDH                           | Santa Cruz               | sc-47724                  | 1:1000   |
| SARS-CoV-2 N                    | Abcam                    | ab271180                  | 1:2000   |
| SARS-CoV-2 nsp3                 | GeneTex                  | GTX135589                 | 1:2000   |
| SARS-CoV-2 Spike                | homemade                 | Verified by PMID:35013189 | 1:500    |
